# 1                    **Characterization of missing values in untargeted MS-based** 2                    **metabolomics data and evaluation of missing data handling strategies**

3     *Kieu Trinh Do*<sup>1¶</sup>, *Simone Wahl*<sup>2,3,4¶</sup>, *Johannes Raffler*<sup>5</sup>, *Sophie Molnos*<sup>2,3,4</sup>, *Michael Laimighofer*<sup>1</sup>, *Jerzy*  
4     *Adamski*<sup>6,7</sup>, *Karsten Suhre*<sup>9</sup>, *Konstantin Strauch*<sup>10,11</sup>, *Annette Peters*<sup>2,3</sup>, *Christian Gieger*<sup>2,3</sup>, *Claudia*  
5     *Langenberg*<sup>12</sup>, *Isobel D. Stewart*<sup>12</sup>, *Fabian J. Theis*<sup>1,13</sup>, *Harald Grallert*<sup>2,3,4</sup>, *Gabi Kastenmüller*<sup>4,5#</sup>, *Jan*  
6     *Krumsiek*<sup>1,4,14#</sup>

7     **1** Institute of Computational Biology, Helmholtz-Zentrum München, Neuherberg, Germany, **2**  
8     Institute of Epidemiology II, Helmholtz Zentrum München, German Research Center for  
9     Environmental Health, Neuherberg, Germany, **3** Research Unit of Molecular Epidemiology, Helmholtz  
10    Zentrum München, German Research Center for Environmental Health, Neuherberg, Germany, **4**  
11    German Center for Diabetes Research (DZD e.V.), Neuherberg, Germany, **5** Institute of Bioinformatics  
12    and Systems Biology, Helmholtz-Zentrum München, Neuherberg, Germany, **6** Institute of  
13    Experimental Genetics, Genome Analysis Center Helmholtz Zentrum München, Neuherberg,  
14    Germany, **7** Lehrstuhl für Experimentelle Genetik, Technische Universität München, Freising-  
15    Weihenstephan, Germany, **8** German Center for Cardiovascular Disease Research (DZHK e.V.),  
16    partner-site Munich, Germany, **9** Department of Physiology and Biophysics, Weill Cornell Medical  
17    College in Qatar, Education City, Doha, Qatar, **10** Institute of Genetic Epidemiology, Helmholtz  
18    Zentrum München–German Research Center for Environmental Health, Neuherberg, Germany, **11**  
19    Chair of Genetic Epidemiology, Institute of Medical Informatics, Biometry and Epidemiology, Ludwig-  
20    Maximilians-University, Munich, Germany, **12** MRC Epidemiology Unit, University of Cambridge,  
21    Cambridge, United Kingdom, **13** Department of Mathematics, Technische Universität München,  
22    Garching, Germany **14** Institute for Computational Biomedicine, Engländer Institute for Precision  
23    Medicine, Department of Physiology and Biophysics, Weill Cornell Medicine, New York, USA

24

25     ¶ These authors contributed equally to this work.

26     # **Corresponding authors:**

27     *Dr. Gabi Kastenmüller*, Institute of Bioinformatics and Systems Biology, Helmholtz-Zentrum  
28     München, Neuherberg, Germany, Phone: +49 89 3187-3578, Fax: +49 89 3187-3585, E-mail:  
29     [g.kastenmueller@helmholtz-muenchen.de](mailto:g.kastenmueller@helmholtz-muenchen.de)

30     *Dr. Jan Krumsiek*, Institute of Computational Biology, Helmholtz-Zentrum München, Neuherberg,  
31     Germany, Phone: +49 89 3187-3641, Fax: +49 89 3187-3369, E-mail: [jan.krumsiek@helmholtz-](mailto:jan.krumsiek@helmholtz-muenchen.de)  
32     [muenchen.de](mailto:jan.krumsiek@helmholtz-muenchen.de)

33

## 34 **Abstract**

35 **BACKGROUND:** Untargeted mass spectrometry (MS)-based metabolomics data often contain missing  
36 values that reduce statistical power and can introduce bias in epidemiological studies. However, a  
37 systematic assessment of the various sources of missing values and strategies to handle these data  
38 has received little attention. Missing data can occur systematically, e.g. from run day-dependent  
39 effects due to limits of detection (LOD); or it can be random as, for instance, a consequence of  
40 sample preparation.

41 **METHODS:** We investigated patterns of missing data in an MS-based metabolomics experiment of  
42 serum samples from the German KORA F4 cohort (n = 1750). We then evaluated 31 imputation  
43 methods in a simulation framework and biologically validated the results by applying all imputation  
44 approaches to real metabolomics data. We examined the ability of each method to reconstruct  
45 biochemical pathways from data-driven correlation networks, and the ability of the method to  
46 increase statistical power while preserving the strength of established genetically metabolic  
47 quantitative trait loci.

48 **RESULTS:** Run day-dependent LOD-based missing data accounts for most missing values in the  
49 metabolomics dataset. Although multiple imputation by chained equations (*MICE*) performed well in  
50 many scenarios, it is computationally and statistically challenging. K-nearest neighbors (*KNN*)  
51 imputation on observations with variable pre-selection showed robust performance across all  
52 evaluation schemes and is computationally more tractable.

53 **CONCLUSION:** Missing data in untargeted MS-based metabolomics data occur for various reasons.  
54 Based on our results, we recommend that *KNN*-based imputation is performed on observations with  
55 variable pre-selection since it showed robust results in all evaluation schemes.

56 **Keywords:** untargeted metabolomics, missing values imputation, limit of detection, batch effects,  
57 runday effects, *MICE*, K-nearest neighbor, mass spectrometry

## 58 **Key messages**

- 59       • Untargeted MS-based metabolomics data show missing values due to both batch-specific  
60       LOD-based and non-LOD-based effects.
- 61       • Statistical evaluation of multiple imputation methods was conducted on both simulated and  
62       real datasets.
- 63       • Biological evaluation on real data assessed the ability of imputation methods to preserve  
64       statistical inference of biochemical pathways and correctly estimate effects of genetic  
65       variants on metabolite levels.
- 66       • *KNN*-based imputation on observations with variable pre-selection and  $K = 10$  showed robust  
67       performance for all data scenarios across all evaluation schemes.
- 68

## 69 **Introduction**

70 In epidemiological studies, metabolomics is an established tool that provides insights into disease  
71 mechanisms (1), as metabolite profiles generate a molecular readout that is closely linked to the  
72 (patho-)phenotype (2,3). Recent metabolomics studies have identified many metabolites as  
73 candidate biomarkers for various health conditions, such as diabetes (4–6) and cardiovascular  
74 diseases (7,8). Mass spectrometry (MS)-based metabolomics measurements can be performed either  
75 in a targeted or untargeted manner (9). In the former, only a limited number of already known and  
76 biochemically annotated metabolites are captured. In the latter, the measurements are not limited  
77 to predefined signals and offer discovery of novel compounds. While missing values in targeted MS-  
78 based data occur rarely, untargeted MS-based techniques typically produce 20-30% missing values,  
79 affecting more than 80% of the measured compounds (10–13).

80         There are various reasons why metabolite concentrations can be missing in an untargeted  
81 metabolomics dataset. First, it is possible that the molecules are truly absent from the sample, a  
82 situation that may occur e.g. for drug metabolites that only appear in a subset of people taking that  
83 medication. On the other hand, there are several technical reasons that could result in missing  
84 values, including: (i) instrument sensitivity thresholds, below which concentrations of a specific  
85 metabolite might not be detectable in a sample (i.e., below the limit of detection, LOD); (ii) matrix  
86 effects that impede the quantification of a metabolite in a sample through other co-eluting  
87 compounds and ion suppression; (iii) declining separation ability of the chromatographic column and  
88 increasing contamination of the MS instrument; and (iv) limitations in computational processing of  
89 spectra, such as poor selection and alignment of the spectral peaks across samples (14).

90         Commonly, observed patterns of missing data are categorized as either missing completely at  
91 random (MCAR), missing at random (MAR), or missing but not at random (MNAR) (15). In the MCAR  
92 category, the probability of missing values does not depend on observed or unobserved  
93 measurements. In contrast, the occurrence of MAR depends on other observed measurements (for

94 instance, resulting from technical effects, such as overlapping peaks). MNAR describes the  
95 occurrence of missing values that depend on unobserved measurements (for instance, due to issues  
96 with the performance of the machine).

97         Although it is clear that the handling of missing values affects all downstream analyses, it is  
98 less clear how to appropriately handle their occurrence statistically. A simple *ad hoc* approach is  
99 known as complete case analysis (CCA), which only considers samples that do not contain any missing  
100 values in the metabolites analyzed in each statistical analysis step. However, missing data may occur  
101 in some systematic way (i.e., they are dependent on external factors). For example, if all cases in a  
102 case-control study have more missing data than the controls, removing observations that are missing  
103 will lead to bias in biological interpretation (16). Furthermore, CCA can cause severe loss of  
104 information and statistical power by excluding a majority of observations if multivariate methods,  
105 such as principal component analysis or partial correlation networks, are to be performed.

106         A widely used and flexible class of missing data strategies is imputation, which involves the  
107 replacement of missing values by reasonable substitute values. The most commonly used imputation  
108 approaches for metabolomics data assume that missing data occur because they are below the limit  
109 of detection (left-censoring, a variant of MNAR). Therefore, all missing entries of a metabolite are  
110 replaced by a low constant value, such as the actual LOD (if known), zero, or the smallest value found  
111 in the dataset for that metabolite (13). Another LOD-based substitution strategy assumes a  
112 parametric left-truncated normal distribution and performs likelihood-based parameter estimation  
113 on the observed values to reconstruct the truncated part of the distribution. Missing values are then  
114 replaced by numbers drawn from this estimated part (16,17). Additional imputation-based  
115 substitution approaches assume MCAR and replace missing values by the mean or median per  
116 metabolite (12). Advanced approaches use multivariate statistical methods for imputation, including  
117 multiple imputation by chained equations (MICE) (18) and K-nearest neighbors (KNN) imputation  
118 (19,20).

119           Several previous studies have investigated the occurrence and effects of different strategies  
120 for missing values in metabolomics data. Taylor *et al.* (21) reported that no single imputation method  
121 was universally superior, but constant substitution methods consistently showed poor performance.  
122 Gromski *et al.* (12) recommended imputation by Random Forests (RFs) for GC/MS metabolomics data  
123 after evaluating the outputs of supervised and unsupervised learning approaches. Di Guida *et al.* (15)  
124 investigated various combinations of different preprocessing steps to determine which were the  
125 most appropriate for univariate and multivariate analyses of UHPLC-MS metabolomics data. The  
126 authors recommended RF and *KNN*-based imputation for PCA and PLS-DA, respectively (15).  
127 Armitage *et al.* (10) studied missing values in CE/MS metabolomics data and reported *KNN*  
128 imputation to be more effective compared with simpler substitution-based imputation methods.  
129 Finally, in a study by Hrydziuszko and Viant (11), a *KNN*-based imputation approach also  
130 outperformed competing strategies in an investigation of direct infusion Fourier transform ion  
131 cyclotron resonance (DI-FTICR) MS-based metabolomics data.

132           Despite these advances in our understanding of the effects of imputation on metabolomics  
133 data analysis, several aspects have not been addressed by those previous studies. (i) A detailed  
134 statistical description of the patterns of missing values in MS-based metabolomics data has not yet  
135 been published. Most previous studies evaluated imputation strategies assuming only random or  
136 LOD-based missing values without assessing whether this applies to real metabolomics datasets. In  
137 particular, the influence of batch effects on the occurrence of missing values has not been  
138 investigated in any study. If a cohort comprises a large number of samples, the MS runs usually are  
139 spread across multiple days, which is known to influence metabolite measurements due to variation  
140 in instrument sensitivity. Here, the LOD itself is also expected to vary across run days, an assumption  
141 that has not been explicitly accounted for in any studies. (ii) In addition, a simulation framework that  
142 reflects realistic data situations is needed to provide an unbiased evaluation of strategies for handling  
143 missing values. Evaluation of previous studies has been biased in the sense that “complete”  
144 measured data (created by excluding all variables with missing values) with artificially introduced

145 missing values were simulated, which most likely does not mirror realistic missing value patterns. (iii)  
146 Finally, biological validation and biochemical interpretation of the data have not been addressed in  
147 the majority of papers. Only Hrydziusko *et al.* evaluated the ability of different imputation strategies  
148 to preserve metabolic differences between biological groups, which then were related to KEGG  
149 pathways (11).

150 In the present study, we analyzed patterns of missing data and evaluated the performance of  
151 various imputation strategies for untargeted MS-based metabolomics data from serum samples of  
152 the German Cooperative Health Research in the Region of Augsburg (KORA) F4 cohort. Data were  
153 measured on a typical, widely used untargeted MS-based metabolomics platform (Metabolon, Inc.,  
154 USA) and should be representative of many untargeted population-scale metabolomics studies. The  
155 study consisted of three steps: (i) We described and analyzed patterns of missing values and their  
156 possible underlying mechanisms in a real untargeted metabolomics dataset. In particular, we  
157 investigated the occurrence of missing values within and across batches of measurements. (ii) The  
158 insights gained from these analyses were used to introduce realistic patterns of missing data into  
159 simulated data. We applied 31 imputation methods to the datasets and evaluated them with respect  
160 to their ability to achieve correct statistical estimates and hypothesis test results in various data  
161 scenarios. (iii) Finally, the imputation methods were applied to real metabolomics data (KORA F4),  
162 followed by two biologically-driven evaluation schemes. First, we assessed how accurately real  
163 biochemical pathways were reconstructed in data-driven correlation networks inferred from the  
164 imputed data. Second, we verified whether imputation led to a gain in statistical power, while  
165 preserving effects of genetic variants on metabolite levels. The study workflow is visualized in Figure  
166 1.

## 167 Results

### 168 Characterization of missing data patterns in KORA F4 untargeted metabolomics 169 data

170 We used an untargeted metabolomics dataset from the KORA F4 study, which was generated from  
171 fasting serum samples measured on three platforms: LC/MS in both positive (LC/MS+) and negative  
172 modes (LC/MS-), as well as a GC/MS platform. After log-transformation and outlier handling (see  
173 Methods), 1757 samples and 516 metabolites were available for analysis.

174 The dataset contained 19.41% missing values, with 416 (80.6%) metabolites and all  
175 observations showing at least one missing value. The majority (301) of these 416 metabolites had  
176 fewer than 10% missing values (Figure 2A). For only 9.9% (51) of the metabolites, more than 70% of  
177 the measurements were missing. The amount of missing values per observation ranged from 11.4%  
178 to 32.2%, with an average of 19.6% (Figure 2B).

#### 179 *LOD-based missing values*

180 For metabolomics data, a common assumption is that missing values occur because of low  
181 concentrations that are below the limit of detection. To explore this assumption, we analyzed missing  
182 values of a metabolite using a second, strongly correlated metabolite, which we term the *auxiliary*  
183 metabolite. The auxiliary metabolite is defined as the metabolite with the highest correlation ( $r$ ) to  
184 the given metabolite. Due to its strong correlation, we assume that insights into the pattern of  
185 missing values of a metabolite can be gained from the corresponding non-missing observations of its  
186 auxiliary metabolite. For example, assuming that metabolite A has missing values in certain  
187 observations for which its auxiliary metabolite B has measurements. If these measurements in B are  
188 low then a missing value in A most likely occurred because the actual concentrations were below the  
189 LOD. We required a minimum correlation of  $r = 0.3$  for auxiliary metabolites, but other values gave  
190 qualitatively similar results (File S1).



191 Overall, an auxiliary metabolite was available for 56.6% of the metabolites. Of those, 62.0%  
192 showed a clear tendency for missing values to be below the LOD (see Methods and File S1). An example  
193 for a clear LOD-tendency is shown for 7-methylxanthine in Figure 2C. This compound is a metabolite  
194 of caffeine metabolism that is correlated with 3-methylxanthine. The majority of observations with  
195 missing data in 7-methylxanthine showed low values for 3-methylxanthine, indicating that the 7-  
196 methylxanthine values were most probably below the LOD. An example for a metabolite pair that  
197 does not show an LOD-based missingness pattern is provided in Figure 2D for 1-  
198 arachidonoylglycerophosphocholine (1-AGPC) and its auxiliary metabolite 1-  
199 docosahexaenoylglycerophosphocholine (1-DGPC). Unlike the previous example, observations with  
200 missing data for 1-AGPC showed values varying over the whole range of 1-DGPC. Consequently, this  
201 suggests that LOD does not adequately explain the pattern of missing values for 1-AGPC. Scatterplots  
202 of investigated metabolites and their corresponding auxiliary metabolites, as well as boxplots of  
203 concentrations in the auxiliary metabolites for missing and non-missing observations in the  
204 investigated metabolites can be found in File S1.

205 Although the LOD-tendency was observed for many metabolites, there was no clear LOD threshold  
206 separating missing and observed measurements across all metabolites (Figure 2C), which would have  
207 been the case if LOD was the only underlying mechanism for missing data. Instead, the values of the  
208 auxiliary metabolites with missing values in the investigated metabolites were spread broadly over a  
209 range of lower values, indicating a blurred rather than a single fixed LOD for all metabolites.

#### 210 *Run day-dependent missing values*

211 Batch (run day) effects also can drive systematic patterns of missing data due to daily variation in  
212 instrument sensitivity. To examine whether missing data depended on overall run day quality, we  
213 examined the amount of missing values per run day for each platform (LC/MS+, LC/MS-, or GC/MS).  
214 Subsequently, we investigated whether metabolites were affected differently by run day quality.

215           The KORA F4 samples were measured on 53 run days with 34 samples on average per day. If  
216 missing values were dependent on run day quality due to variation in instrument performance (e.g.,  
217 caused by LC or GC column decline), we would expect there to be some days for which samples  
218 overall contained more (“bad” run day) or fewer (“good” run day) missing values compared with the  
219 average. Indeed, we observed such “bad” and “good” run days for all three platforms (Figure 3A).  
220 While the run day-specific amount of missing values tended to be correlated between LC/MS<sup>-</sup> and  
221 LC/MS<sup>+</sup> (correlation of the run day-specific median of missing values between the two platforms was  
222  $r = 0.36$ ), there was no correlation between LC/MS<sup>+/-</sup> and GC/MS. This suggests that changes in  
223 instrument performance, rather than global effects (such as those that could originate from sample  
224 preparation) were responsible for differences in run day quality.

225           Although there was an overall effect of run day quality on the pattern of missing values, we  
226 observed considerable differences in the standard deviations (SD) of run day-specific missing values  
227 for metabolites with the same amount of missing data (Figure 3B). This suggests that metabolites  
228 were affected differently by run day quality. For example, the bile acid ursodeoxycholate (46% total  
229 missing data) showed relatively low variation in run day missing data (SD = 0.12) (Figure 3**Figure 3C**).  
230 However, for gamma-glutamylisoleucine (Figure 3D), a metabolite with a similar total amount of  
231 missing values (42%), the observed variation in missing data across run days was substantially larger  
232 (SD = 0.22).

### 233 *Run day-dependent LOD mechanism*

234 The observed run day-dependent pattern of missing data, together with the blurred LOD-based  
235 pattern, suggests that different run days may exhibit different LODs, which contributed to the blurred  
236 global LOD effect. To verify this, we calculated the correlation between run day mean and run day  
237 missingness for all metabolites. A histogram of the correlation coefficients is shown in Figure 4A. The  
238 majority of metabolites displayed a strong tendency for negative correlations. An example for run  
239 day-specific LODs is shown in Figure 4B–C: for 7-methylxanthine, the correlation of run day mean and

240 the run day-specific amount of missing values is  $r = -0.68$  (Figure 4B). Run days with low means  
241 tended to have a higher amount of missing values (Figure 4C). Density plots for all metabolites before  
242 and after run day normalization can be found in File S2.

243

244 Taken together, we observed that batch (run day) effects on the limit of detection can result in a  
245 blurred LOD-effect after run day normalization, which can explain patterns of missing values in most,  
246 but not all, metabolites.

247

## 248 **Evaluation of imputation approaches in a simulation framework**

249 As shown in the previous analyses, not all of the missing data in MS-based metabolomics studies can  
250 be attributed to run day-dependent LOD-based missing data. Thus, the optimal imputation approach  
251 should perform well across all possible patterns. We conducted a simulation study to compare  
252 statistical estimates between imputed and complete data. We simulated incomplete data according  
253 to the patterns of missing values observed in the real metabolomics data and imputed these data  
254 using various imputation approaches. We then evaluated these approaches for recovering correct  
255 statistical estimates after conducting correlation and regression analyses.

### 256 ***Simulation setup and evaluation criteria***

257 We simulated six mechanisms for missing data derived from observations in the real data (see  
258 Methods, File S3, and Figure 5A–E): (i) *Fixed LOD*, as an extreme form of systematic missing values  
259 below a global LOD; (ii) *Probabilistic LOD*, where the probability of a missing value increases at lower  
260 values, which should resemble the blurred LOD-based patterns observed in the real data; (iii) *Run*  
261 *day-specific fixed LOD*, where LOD is assumed to vary across run days; (iv) *Run day-specific*  
262 *probabilistic LOD*, where a probabilistic form of LOD is assumed to occur across run days; (v)  
263 *Unsystematic (random) missingness*, for missing data with an unknown reason; and (vi) *Mixtures of*  
264 *LOD-based and unsystematic missingness*. Based on these 6 mechanisms, we created various

265 parameter scenarios resembling realistic conditions. For each scenario, we conducted 250  
266 simulations to assess whether the imputation methods could reconstruct statistical estimates of  
267 Pearson correlation, partial correlation, linear regression (results shown in File S3), and logistic  
268 regression. To this end, we calculated type 1 error as the proportion of simulations in which a  
269 significant estimate was obtained when the true correlation was equal to zero. In addition, we  
270 calculated power as the proportion of significant estimates when the true correlation was unequal to  
271 zero. We also estimated bias, which is shown in File S3. A detailed description of the simulation and  
272 evaluation framework is also provided in File S3.

### 273 *Missing data handling strategies*

274 We applied 31 imputation approaches (see Figure 5F; detailed descriptions in Methods and File S4)  
275 on the simulated data. Some were adapted to account for run day-specific missing values. The  
276 imputation approaches followed different concepts, which could have one of the following four  
277 properties or combinations thereof: (i) approaches that explicitly assume LOD-based missing values,  
278 (ii) approaches that consider run day-specific missing values, (iii) multivariate procedures using  
279 correlations among variables, and (iv) multiple imputation (MI) strategies. The MI approaches usually  
280 comprise imputation, analysis, and pooling steps. In the first step, the incomplete data are imputed  
281  $m$  times to produce  $m$  complete datasets. Subsequently, statistical analysis is performed on each of  
282 the  $m$  complete datasets and then the  $m$  analyses are combined to one final result.

### 283 *Simulation results*

284 In the following, we evaluate the performance of the four imputation properties (i)–(iv) introduced  
285 above. Simulation results from other data scenarios, all variations of the imputation approaches  
286 used, and the combination of parameter settings are available in File S5.

287       Property (i): Methods that explicitly assume LOD-based missing values and perform  
288 imputation globally without taking run day information into account (*min*, Richardson & Ciampi (*RC*),  
289 imputation by truncated sampling (*ITS*)), showed inflated type 1 error rates and low power for both

290 correlation and regression analysis. This was expected for three reasons. First, for a data scenario  
291 with run day-dependent probabilistic LOD-based missing values, these methods underestimate the  
292 LOD for most of the rundays and replace missing entries by too low values (Figure 6A). Second, for a  
293 data scenario with random missing values, they expectedly fail since the underlying assumption of an  
294 LOD is not met (Figure 6B). Finally, *min* and *RC* impute a metabolite by replacing all of its missing  
295 entries by a constant value, which substantially distorts the metabolite distribution (see File S5).

296       Property (ii): The LOD-based methods that take run days into account (*RC-R*, *ITS-R*) were  
297 expected to perform well in a simulated data scenario with run day effects (Figure 6A). Unexpectedly,  
298 we observed an inflated type 1 error rate and decreased power for all three statistical analyses  
299 (Pearson correlation, partial correlation, and logistic regression). *RC-R* and *ITS-R* assume that the  
300 observed values of a metabolite follow a truncated normal distribution, which is parametrized by  
301 maximum likelihood estimation (MLE), in order to replace missing values with randomly drawn values  
302 from the truncated part. The instability of MLE due to small sample sizes available within run days  
303 could explain the poor performance of these approaches. The same poor performance was observed  
304 for scenarios with a mixture of run day-dependent LOD-based and random missing values (Figure 6C).  
305 For the dataset with only random missing values, LOD- or run day-based approaches showed the  
306 expected strong reduction in power since here the underlying assumption of a truncated normal  
307 distribution is false (Figure 6B).

308       Property (iii): Multivariate approaches (imputation based on chained equations (*ICE*) and  
309 *KNN*-based imputation) take into consideration the correlation between variables or observations.  
310 *ICE* approaches had high power, but an increased type 1 error rate when missing value proportions  
311 increased (Figure 6). *KNN*-based imputation on observations with variable pre-selection and  $K = 10$   
312 (*KNN-obs-sel(10)*) was one of the best performing methods with high power and an overall marginal  
313 type 1 error rate, even for a high amount of missing values. The power for *KNN-obs* was also high,  
314 but it showed high type 1 error rate and therefore a poor ability to correctly identify truly absent

315 associations. In contrast, *KNN-vars* had a low type 1 error rate, but decreased power, which became  
316 more pronounced at higher amounts of missing values.

317 Property (iv): Single imputation procedures often underestimate the variability of statistical  
318 estimates, resulting in inflated type 1 error rates. This should be avoided by approaches performing  
319 multiple imputations (MI). MI versions based on LOD- (*MITS*) and run day-effects (*MITS-R*) indeed had  
320 decreased type 1 error rates, although power was low (Figure 6). *MICE* with Bayesian linear  
321 regression (*MICE-norm*) or predictive mean matching (*MICE-pmm*) as imputation model showed  
322 negligible type 1 error rates and high power for all scenarios with up to 50% missing values. At higher  
323 amounts of missing data, the power decreased considerably, but the type 1 error remained marginal  
324 (File S5). A slight modification of the *MICE* algorithm applied widely in the metabolomics field (here  
325 termed *MICE-avg*) was performed on each imputed data, and comprised the pooling of the imputed  
326 data with subsequent statistical analyses rather than pooling the statistical estimates after analysis.  
327 This approach showed high power, but increased type 1 error rates, in particular for >30% missing  
328 values.

329 Taken together, when considering all patterns of missing data and all evaluation criteria,  
330 *KNN-obs-sel(10)* and *MICE-norm* were the most robust approaches. For higher amounts of missing  
331 data ( $\geq 50\%$ ), *MICE* showed a strong decrease in power with marginal type 1 error, whereas *KNN-obs-*  
332 *sel(10)* had only slightly increased type 1 error rates with high power.

333

### 334 **Evaluation of imputation approaches on real MS-based metabolomics data**

335 We conducted a biological evaluation of all approaches using the metabolomics data from the KORA  
336 F4 population study. An objective criterion for evaluation is challenging to construct, since the true  
337 values underlying the missing ones are unknown. We devised two indirect tests that assessed  
338 imputed values for biological validity. First, we assessed the ability of imputation methods to  
339 statistically reconstruct biochemical pathways in metabolomics data. Second, we evaluated the gain

340 in statistical power while preserving the true effect size of genetic variants (SNPs) on metabolite  
341 levels.

### 342 *Evaluation based on pathway modularity*

343 GGMs are based on partial correlations and reflect conditional dependencies in multivariate Gaussian  
344 distributions (5,22). When applied to metabolomics data, they reconstruct a precise picture of the  
345 metabolic network, showing a modular topology with respect to known pathways. In other words,  
346 metabolites will tend to be correlated with other metabolites from the same biochemical pathway  
347 (5,22,23). We used this pathway-based modularity in a metabolic network as a quality criterion to  
348 indicate whether the imputation methods generally were capable of maintaining biochemically valid  
349 edges.

350 Each imputation strategy was applied to the KORA F4 metabolomics data, and a GGM was  
351 estimated for each obtained dataset. Subsequently, we used *a priori* pathway annotations from  
352 Metabolon Inc., where each metabolite was assigned to one pathway (e.g., branched-chain amino  
353 acids, lysolipids, xanthines) to calculate pathway-based modularity ( $Q$ ), according to (22,24). This  
354 measure reflects the ratio of metabolite correlations within *versus* across pathways. A high  $Q$  value  
355 indicates a dense within-pathway correlation compared with cross-pathways. Variability was  
356 estimated by bootstrap resampling (see Methods).

357 Across all datasets, we obtained modularity values ranging from 0.384 to 0.434 (Figure 7A).  
358 Imputation methods that explicitly considered the LOD-based mechanism and their run day-specific  
359 versions (Figure 5, property (ii)) did not outperform alternative approaches. Multivariate, single  
360 imputation methods (property (iii)) yielded low  $Q$  values, except for *KNN-obs-sel*, which achieved the  
361 overall third best result ( $Q = 0.422$  for  $K = 10$ ) (Figure 5). The performance of *KNN*-based imputation  
362 methods strongly depended on the definition of neighbors (variables or observations) and on the  
363 number of these neighbors ( $K$ ). The MI procedures (property (iv)) *MITS*, *MITS-R*, and *MICE-avg*  
364 performed poorly, whereas the networks generated on *MICE* imputed data showed the overall

365 highest modularity ( $Q = 0.434$  and  $Q = 0.424$  for *MICE-norm* and *MICE-pmm*, respectively) (Figure 5).  
366 Overall, the three best performing approaches were *MICE-norm*, *MICE-pmm*, and *KNN-obs-sel(10)*.

### 367 *Evaluation based on metabolite-SNP associations*

368 Using KORA F4 data ( $n = 1750$ ), we determined the ability of imputation methods to gain statistical  
369 power compared with complete case analysis (*CCA*, deleting samples with any missing values) while  
370 preserving the effect of genetic variants on metabolite levels in human blood. For the evaluation, we  
371 selected a set of metabolite-SNP associations from a previous genome wide association study  
372 (GWAS) in the KORA F4 and TwinsUK cohorts, for which a functional connection between the gene  
373 and the metabolite was biologically evident (Table S8) (25). For example, *GOT2* (*rs4784054*), which  
374 was associated with concentrations of phenyllactate, encoded an enzyme that catalyzes the  
375 conversion of phenylalanine to phenylpyruvate, which is then converted to phenyllactate (25,26).

376 We investigated the gain in statistical power when using imputed datasets compared with  
377 the power obtained with *CCA* for 18 of such metabolite-SNP pairs, where the metabolite had  
378 between 10% and 70% missing values. Statistical power gain was calculated as the negative log<sub>10</sub> of  
379 the ratio of the p-values estimated for the imputed data to the p-values estimated for *CCA* in  
380 corresponding linear regression models (detailed results in File S8 and Table S8). A high ratio  
381 indicates greater power for imputed data. As a second evaluation criterion, we calculated the log<sub>2</sub>  
382 absolute ratio of the effect sizes obtained from the regression models for imputed data and those  
383 derived from *CCA* in KORA F4 (see Methods). A log<sub>2</sub> ratio close to zero indicates that the imputation  
384 method was able to preserve effect sizes, whereas imputations yielding a highly negative or positive  
385 log<sub>2</sub> ratios indicate underestimation or overestimation of the effect sizes, respectively.

386 Imputation with LOD-based methods (property (i)) yielded a gain in power for up to seven  
387 genetic associations of the 14 metabolites (Figure 7Figure 7). For two of these associations  
388 (tetradecanedioate and *SLCO1B1*; and hexadecanedioate and *SLCO1B1*), effect sizes were  
389 underestimated, and for the association between 1-methylurate and *NAT2*, the effect size was



390 overestimated across all methods, except for *MITS-R*. Run day-specific imputation methods (property  
391 (ii)) performed well, with *ITS-R* yielding the highest number of associations (12) with greater  
392 statistical power, of which seven showed effect sizes similar to effect sizes derived from *CCA*. The  
393 best methods among multivariate approaches (property (iii) and (iv)) were *MICE-avg-norm*, *KNN-obs-*  
394 *sel(10)*, and *KNN-obs-sel(20)*, all three of which generated a gain in statistical power for 12  
395 associations. These methods also showed good performance in preserving genetic effects and did not  
396 show severe overestimation or underestimation of effect sizes. *MICE-norm/-pmm/-adjR* showed only  
397 moderate performance with a power gain for seven associations.

398 In an additional analysis, we used results from the EPIC-Norfolk cohort with  $n = 10\,634$   
399 subjects (27), to assess the ability of imputation methods to preserve effects of genetic variants on  
400 metabolites. We hypothesized that the effect sizes would be estimated more accurately in this much  
401 larger dataset, and effect sizes obtained with KORA F4 imputed data should approximate effect sizes  
402 derived from EPIC-Norfolk. Overall, we observed that the majority of SNP-metabolite pairs showed  
403 either an overestimation or an underestimation of effect sizes across all imputation methods. This  
404 tendency might reflect differences between the cohorts KORA F4 and EPIC-Norfolk rather than  
405 differences between imputation strategies (see detailed results in File S7 and Table S8).

406 Overall, for nearly all metabolite-SNP pairs, this analysis showed that statistical power was  
407 increased by imputing missing values and the effect sizes could be preserved. *ITS-R*, *MICE-avg-pmm*,  
408 *KNN-obs-sel* with  $K = 10$  and  $K = 20$  were the imputation methods that generated the highest number  
409 of associations (12) and resulted in a gain in statistical power compared with *CCA*.

410

## 411 Discussion

412 In this study, we investigated patterns of missing data in a typical example of untargeted MS-based  
413 metabolomics data and their possible underlying mechanisms. Insights gained from these analyses  
414 were used to generate simulated data that reflected the real data situation for a comprehensive  
415 evaluation of 31 imputation methods. Finally, we applied the imputation strategies to real MS-based  
416 metabolomics data from the German KORA F4 study and evaluated them using biological validity  
417 measures.

418 For metabolomics data, an intuitive assumption is that missing data occur when metabolite  
419 concentrations fall below the machine's LOD. Indeed, we found evidence for systematic patterns of  
420 missing data due to LOD- and batch-effects for a large proportion of the analyzed metabolites.  
421 Missing data were found to be influenced by run day quality, although metabolites varied in their  
422 susceptibility to this effect. Finally, we found a negative correlation between run day mean and  
423 missing data per run day, further confirming LOD-based mechanism within run days. The existence of  
424 multiple run day-dependent LODs possibly accounted for the blurred rather than fixed global LOD  
425 observed in the data. It has been suspected that multiple detection limits arise from factors such as  
426 batch (run day) effects (27). However, to the best of our knowledge, this is the first time that these  
427 effects have been systematically explored so far.

428 We evaluated 31 imputation methods in an evaluation framework consisting of three  
429 schemes: (i) unbiased estimation of statistical estimates and hypothesis test results based on  
430 simulated data, (ii) statistical reconstruction of biochemical pathways in metabolic networks, and (iii)  
431 the ability to preserve effects of genetic variants on metabolite levels while allowing for a gain in  
432 statistical power.

433 *MICE-norm* was the best performing imputation method for evaluation scheme (i) and (ii), but it  
434 showed only moderate performances in the metabolite-SNP analysis. One major drawback of this  
435 method is that multiple imputations have to be performed, making these approaches statistically and

436 computationally challenging. For  $m$  imputations, the desired statistical analyses must be performed  
437 on each of the  $m$  imputed datasets, and then the resulting  $m$  estimates must be combined to one  
438 statistical result. A widely applied alternative is to perform  $m$  multiple imputations and then combine  
439 the  $m$  complete datasets to one final dataset containing the average of the imputed values (*MICE-*  
440 *avg*). That is, *MICE-avg* does not require statistical estimates to be pooled, and therefore, it is much  
441 easier to apply. However, this simplicity is accompanied by an underestimation of metabolites'  
442 variances, resulting in poorer performance of statistical estimation (correlation and regression  
443 coefficients) and reconstruction of biochemical pathways.

444 A feasible, but better performing method was *KNN-obs-sel(10)*, which uses *KNN*-based  
445 imputation on observations with variable pre-selection and  $K = 10$ . This method ranked highly in all  
446 evaluation schemes. Other *KNN*-based imputation schemes, including *KNN*-based imputation on  
447 variables (*KNN-vars*) and on observations without variable pre-selection (*KNN-obs*), consistently  
448 showed poor performance across all evaluation schemes. Our results are in line with observations  
449 from previous studies, where *KNN*-based imputation performed well (10,11,15,28). However, we also  
450 observed that variations of *KNN* imputation lead to substantially different results, as in previous  
451 studies (20,28).

452 Although we observed LOD- and run day-based effects in real metabolomics data, methods  
453 that explicitly consider this information did not outperform competing approaches in the first two  
454 evaluation schemes. This is likely due to the fact that they perform imputation in a univariate manner  
455 without taking the correlation between the variables into account. Moreover, all of these LOD-based  
456 methods include maximum likelihood estimation in their imputation process, which was found to  
457 perform well only for larger sample sizes in previous studies (27,29). In our study, the number of  
458 observations within run days is limited, resulting in considerable instability of the MLE. LOD-based  
459 run day-dependent methods performed well with respect to gain in statistical power in the analysis  
460 of metabolites–SNP associations.

461           In summary, we have presented a detailed description of patterns of missing data in  
462   untargeted MS-based metabolomics data. In particular, we considered, for the first time, the effects  
463   of run days on systematic patterns of missing data. Our work showed that missing data occur in most  
464   cases due to LOD effects, which are moreover run day-dependent. Nevertheless, *MICE* and *KNN*-  
465   based imputation, methods that do not explicitly consider LOD-based effects, performed best when  
466   tested in both statistical and biological evaluation schemes. This is most likely because these  
467   methods take into account multivariate dependencies within the data. The two approaches are For  
468   future studies, we recommend *KNN*-based imputation on observations with  $K = 10$ , since it  
469   consistently performed well across all data scenarios and all evaluation schemes, and is  
470   computationally non-demanding for daily data analysis.

471

## 472 **Material and Methods**

### 473 **Study cohort, metabolomics and genotype measurements**

474 Data from 1768 fasting serum samples of the German Cooperative Health Research in the Region of  
475 Augsburg (KORA F4) population cohort (30) was used, comprising 910 females and 858 males. Age  
476 distribution was  $60.53 \pm 8.79$  years for females and  $61.20 \pm 8.78$  years for males. Body mass index  
477 (BMI) distribution was  $27.88 \pm 5.24$  kg/m<sup>2</sup> for females and  $28.46 \pm 4.29$  kg/m<sup>2</sup> for males.

478 Serum metabolomics measurements were performed on three platforms, LC/MS<sup>-</sup> (negative  
479 mode), LC/MS<sup>+</sup> (positive mode), and GC/MS by Metabolon, Inc. (Durham, NC, USA). The 1768 serum  
480 samples were measured on 53 different run days, with 34 samples on average per run day. A total of  
481 516 metabolites were quantified, of which 303 had an identified chemical structure. A more detailed  
482 description of sample acquisition, experimental procedures, and metabolite identification can be  
483 found in File S10.

484 Each known metabolite was annotated with one of 68 pathways by Metabolon, Inc. A full list  
485 of all measured metabolites, including pathway annotations, can be found in Table S9. For correlation  
486 analysis, data were normalized for run day-effects by dividing each metabolite by run day median.  
487 Since metabolite measurements were assumed to follow a log-normal distribution, the data were  
488 log-transformed for all statistical analyses. The run day-corrected and log-transformed data were  
489 used to determine outlier samples. Eleven individuals with a Mahalanobis distance (calculated across  
490 the complete dataset) greater than four SD from the mean were considered outliers and excluded  
491 from the dataset. For the biological evaluation schemes, age, sex, and BMI were used as standard  
492 covariates. Seven samples were excluded due to incomplete information in these phenotypes,  
493 resulting in 1750 individuals in total.

494 The KORA F4 cohort was genotyped using the Affymetrix Axiom platform. After quality  
495 control, genotype data (measured or imputed according to data from the 1000 genomes project,  
496 phase 1 version 3) were available for 1685 of the 1750 individuals.

### 497 **Missing data in KORA F4**

498 To explore the mechanism for the missing data of a given metabolite  $m$ , a second (auxiliary)  
499 metabolite  $m_{aux}$  was used.  $m_{aux}$  was defined as the metabolite with the strongest Pearson  
500 correlation to  $m$  (at least 0.3). An LOD-tendency was assumed if the average value of  $m_{aux}$  in  
501 samples with missing values in  $m$  was significantly lower than the average of  $m_{aux}$  in samples with  
502 measured values in  $m$ . Significance was assessed using Wilcoxon–Mann–Whitney tests with  $\alpha = 0.05$   
503 after Bonferroni correction for multiple testing.

504 For all correlation analyses, only metabolites with more than 10% and less than 70% overall  
505 missing values were considered.

506 In order to explore whether missing values varied among run days, the normalized  
507 proportions of missing values among the 53 run days were compared within each platform. For a  
508 metabolite  $m$  and a run day  $d$ , the normalized amount of run day-specific missing values was  
509 calculated as the number of missing values for  $m$  in  $d$  divided by the total number of samples  
510 measured in  $d$ , divided by the median value of missing data of  $m$  over all run days.

### 511 **Simulation study**

512 Insights gained from the analyses of missing values in real MS-based metabolomics data were used to  
513 create artificial data that best mirror reflected patterns of missing data. A brief overview of the  
514 simulation framework is provided below, and a detailed description can be found in File S3. For each  
515 set of parameters corresponding to a certain data situation, 250 random datasets were generated.  
516 For each dataset, two variables were simulated by drawing from a multivariate normal distribution,  
517 with sample sizes ranging from 100 to 1000, and with means equal to zero and covariance chosen  
518 such that variances were equal to one (representing scaled variables). The Pearson correlation

519 between the two variables was ranged from 0 to 0.4. In addition, for the multivariate analyses and to  
520 evaluate imputation methods that apply to a multivariate strategy, auxiliary variables correlated with  
521 the two main variables were introduced. Their number and correlation strength were chosen to  
522 match the real data (for details, see File S3).

523 Simulated observations were randomly assigned to “run days” with the number of run days  
524 chosen such that each run day comprised 34 observations, according to the average number found  
525 for the real KORA F4 measurements.

526 A proportion of missing values (10%, 30%, 50%, and 70%) was introduced into the main  
527 variable pair according to different mechanisms derived from our observations in the KORA F4  
528 Metabolon data (Figure 5, File S3).

529 We used the following parameter settings for the results in the main manuscript: moderate  
530 variability of missing data across run days (see File S3), uncorrelated run day-specific missing patterns  
531 of the metabolite pair, and varying association of the inverse relation between metabolite  
532 concentration and missing values, at  $n = 250$  and in the presence of informative auxiliary  
533 metabolites. For Pearson and partial correlation analysis, both main variables had the same degree of  
534 missing data. For logistic regression analysis, the predictor variable had a mixture of 50% run day-  
535 dependent probabilistic LOD-based missing data and 50% non-systematic missing data. Results for  
536 more parameter settings can be found in File S5.

### 537 **Imputation approaches**

538 A variety of imputation methods (Figure 5 **Figure 5**) were selected because they were reported in the  
539 context of metabolomics data or were developed and adopted to address characteristics in the  
540 current dataset.

541 **Mean imputation (mean):** All missing values of each incomplete variable are replaced by the average  
542 of the observed values of that metabolite. **Minimum imputation (min):** All missing values of each

543 incomplete variable are replaced by the smallest observed value of that metabolite (5,13,16).

544 **Richardson & Ciampi (RC):** Assuming that missing values occur due to LOD and the observed

545 metabolite values follow a left-truncated normal distribution, maximum likelihood is used to

546 estimate this distribution. A missing value  $x$  is then replaced by the expected value of  $x$  conditional

547 on  $x$  being below the LOD,  $E(x|x \leq LOD)$  (17). **Imputation by truncated sampling (ITS):** This is an

548 extension of the RC method, where the missing values are replaced by randomly drawn values from

549 the censored part of the estimated truncated normal distribution. **Multiple imputation by truncated**

550 **sampling (MITS):** ITS is applied as described above, but multiple imputation is performed according

551 to Rubin's rules (31) using the R package *mice*, version 2.25. These rules include: (i) the datasets are

552 imputed  $m$  times, (ii) each of the  $m$  completed datasets is analyzed separately, and (iii) the  $m$

553 resulting estimates are combined using established procedures (31–33). The number of imputations

554 was set to  $m = 20$  for all methods. **Runday-specific LOD-based methods (RC-R/ITS-R/MITS-R):** The

555 previously described methods RC, ITS, and MITS are applied within run days where at least 17

556 observations are available. In RC-R, the remaining missing values are set to the mean of all available

557 expected values. For ITS-R and MITS-R, the remaining missing values are replaced using ICE-norm (see

558 below). **Imputation by chained equations (ICE-norm/-pmm/-adjR)** was performed using the R

559 package *mice*, version 2.25. It uses a repeated chain of equations through the incomplete variables,

560 where in each imputation model, the respective incomplete variable is modeled as a function of the

561 remaining variables (34–36). In ICE-norm, a Bayesian linear regression is used as the imputation

562 model, whereas in ICE-pmm (predictive mean matching as imputation model), missing values are

563 replaced by a random draw of measured values from other observations with the closest predicted

564 values. In ICE-adjR, a model is specified with random intercept per run day, which aims to better

565 utilize run day information. This model assumes that variable values (i.e., metabolite concentrations)

566 have a run day-specific component, which varies randomly following a normal distribution. **Multiple**

567 **imputation by chained equations (MICE-norm/-pmm/-adjR)** was performed using the R package

568 *mice*, version 2.25: MICE-norm, MICE-pmm, and MICE-adjR consisted of  $m = 20$  parallel imputation



569 runs of *ICE-norm*, *ICE-pmm*, and *ICE-adjR*, respectively. Subsequently, the estimates are combined  
570 using Rubin's rules as described above for *IMITS*. ***MICE average version (MICE-avg-norm/-pmm)***: *ICE-*  
571 *norm* or *ICE-pmm* is applied multiple ( $m = 20$ ) times in parallel, followed by combining the  $m$   
572 imputed datasets to one final dataset as the average of the imputed values. ***K-nearest neighbor***  
573 ***imputation (KNN-var(K)/KNN-obs(K)/KNN-obs-sel(K))***: In *KNN-var* and *KNN-obs*, missing values of  
574 each variable are replaced by the weighted average of pre-specified  $K$  nearest variables and  
575 observations, respectively. Distances to neighbors were defined as Euclidean distance and weights  
576 were chosen as  $e^{-d}$ , where  $d$  defines the distances between two variables or observations. In *KNN-*  
577 *obs-sel*, *KNN-obs* is performed by selecting the strongest correlated variables with  $|\rho| \geq 0.2$ , but it  
578 was constrained to a minimum of 5 and a maximum of 10 variables. The number of neighbors for  $K$   
579 was set to 3, 5, 10, and 20.

580 More detailed descriptions of *RC*, *RC-R*, *ITS*, *IMITS*, *ICE*, and *KNN*-based methods can be found in File  
581 S4. The two best performing methods, *KNN-obs-sel(K)* and *MICE* are available as R code in File S11.

## 582 **Statistical evaluation of missing data handling strategies in the simulation study**

583 Pearson correlation, partial correlation, linear regression, and logistic regression analysis were  
584 performed, and the ability of imputation methods to reconstruct true associations and unbiased  
585 hypothesis test results was evaluated. For logistic regression, a dichotomized variable was simulated  
586 by discretizing one of the simulated continuous variables: all values above the median were set to 1  
587 and all values below the median were set to 0. This dichotomized variable was used as response and  
588 the remaining continuous variable as predictor. For MI strategies, the resulting (correlation or  
589 regression coefficient) estimates and their variances were combined using Rubin's rules. The  
590 obtained point estimates were then compared with the true underlying values by assessing the  
591 validity of hypothesis tests. To this end, type 1 error was calculated as the proportion of significant  
592 estimates (at  $\alpha = 0.05$ ) after imputation when there was no true effect. Power was calculated as the

593 proportion of significant estimates (at  $\alpha = 0.05$ ) after imputation in the presence of a true effect.

594 Detailed results can be found in File S5.

## 595 **Evaluation based on pathway modularity**

596 This analysis was based on pathway annotations from Metabolon Inc. (see Supporting Information  
597 S9). Each imputation strategy was applied to the KORA F4 metabolomics data, resulting in different  
598 imputed datasets. All unknown metabolites were excluded since these compounds were not assigned  
599 to a pathway. For each imputed dataset, a Gaussian graphical model (GGM) was estimated to infer a  
600 network using the R package *GeneNet*, version 1.2.12. In previous studies, we have demonstrated  
601 that these models correctly reconstruct biochemical pathways from the data (22,25,37). In the case  
602 of MIs, a GGM was estimated for each imputed dataset, followed by combining partial correlations  
603 using Rubin's rules after a Fisher Z-transformation. The network was constructed using partial  
604 correlations that are significantly different from zero after Bonferroni correction for  $n * (n - 1)/2$ ,  
605 where  $n$  is the number of metabolites.

606 The pathway-based network modularity measure  $Q$  (22,24) was calculated for each network as

$$607 \quad Q = \sum_{i=1}^{|S|} \left[ \frac{A(V_i, V_i)}{A(V, V)} - \left( \frac{A(V_i, V)}{A(V, V)} \right)^2 \right],$$

608 where  $|S|$  is the total number of pathways,  $V$  is the set of all metabolites, and  $V_i$  describes the subset  
609 of metabolites annotated with pathway  $i$ .  $A(V_i, V_j)$  is the number of edges between any two node  
610 sets  $V_i$  and  $V_j$ . The variance of  $Q$  was estimated non-parametrically using bootstrapping of the  
611 original dataset (R package *boot*, version 1.3-15) with 1000 runs.

## 612 **Evaluation based on metabolite-SNP associations**

613 Linear regression was performed using KORA F4 CCA and the results were compared with each other.  
614 For this analysis, we selected metabolite-SNP pairs for which (i) a genome-wide significant  
615 association could be identified in the meta-analysis of KORA F4 and TwinsUK cohorts in a previous  
616 GWAS (25) (summary statistics retrieved from <http://www.gwas.eu>); (ii) the proportion of each

617 metabolite's missing values in KORA F4 was between 10% and 70%; (iii) the metabolite was  
618 measured in the EPIC-Norfolk cohort, which we used to further benchmark the preservation of effect  
619 sizes; and (iv) a functional connection between the genetic locus of the SNP and the metabolite (e.g.,  
620 metabolite is a known substrate of the transporter) was evident according to manual curation of the  
621 GWAS results (Table S8). For each imputed dataset, 18 metabolite-SNP pairs were tested for genetic  
622 association using age- and sex-corrected linear regression models under the assumption of an  
623 additive genetic model (metabolite  $\sim \beta_0 + \beta_1 \times \text{SNP} + \beta_2 \times \text{age} + \beta_3 \times \text{sex}$ ). To avoid spurious  
624 associations, metabolic data points greater than four SDs from the mean were removed prior to  
625 computing linear models. For MI approaches, the regression coefficients were pooled using Rubin's  
626 rules as provided by the R package *mice*, version 2.25. For each metabolite-SNP pair, the variance of  
627 the regression coefficients and p-values were estimated using bootstrapping.

628 To explore which imputation approaches increased statistical power, p-values obtained for  
629 the effect sizes based on imputed data were compared with p-values obtained from CCA by  
630 calculating their ratio as  $r_p = \frac{-\log_{10}\left(\frac{p_{imp}}{p_{CCA}}\right)}{-\log_{10}(p_{CCA})}$ , where  $p_{imp}$  was the p-value obtained for imputed data  
631 and  $p_{CCA}$  was the p-value derived from CCA. A ratio less than or equal to zero indicated either no  
632 power gain or a power loss, whereas a ratio greater than zero indicated a drop in p-value, which  
633 suggested that statistical power increased when imputation was performed.

634 In addition to statistical power gain, the imputation approaches should be able to preserve  
635 effect sizes compared to CCA. Standardized effect sizes obtained from the imputed data ( $\beta_{imp}$ ) were  
636 compared with standardized effect sizes estimated for CCA ( $\beta_{CCA}$ ) based on the KORA F4 data (n =  
637 1750) and the EPIC-Norfolk data (n = 10 634), assuming estimates from the EPIC-Norfolk data to be  
638 close to true effects. We calculated the ratio  $r_\beta = \log_2\left(\left|\frac{\beta_{imp}}{\beta_{CCA}}\right|\right)$ , with a low ratio indicating a similar  
639 effect size between the imputed data and CCA. A highly negative or positive  $r_\beta$  indicates an

640 underestimation or overestimation of the effect sizes in imputed data, respectively. A well  
641 performing imputation method is assumed to obtain high  $r_p$  and low absolute  $r_\beta$ .

642

## 643 **Figures and Tables**

644

645 **Figure 1. Flow chart of the study design.** Pre-processed KORA F4 metabolomics data were  
646 used to analyze patterns of missing values in the dataset. Possible underlying mechanisms  
647 were inferred and implemented in a simulation framework to generate data resembling the  
648 observed patterns. Based on these simulated data, imputation methods with different  
649 characteristics were applied and evaluated. Finally, the same imputation approaches were  
650 evaluated using KORA F4 metabolomics and genomics data.

651 **Figure 2. Overall amounts of missing data and LOD effects.** (A,B) The overall fraction of  
652 missing values across metabolites and observations, respectively. (C,D) Scatter plots and  
653 boxplots of selected metabolite pairs to illustrate missing data due to LOD and non-LOD  
654 effects, respectively. Blue - observed concentrations. Red - observed values of the auxiliary  
655 metabolite in observations with missing values of the investigated metabolite. Note that red  
656 data points are not part of the x-axis but were plotted in the same scatterplot for clarity.  $corr$   
657 = correlation,  $p$  = p-value of correlation,  $p_{Wst}$  = p-value of Wilcoxon–Mann–Whitney test.

658 **Figure 3. Run day-dependent effects on missing data.** (A) Normalized amount of missing  
659 values per run day in each platform (LC/MS+, LC/MS-, GC/MS). For a given metabolite and  
660 run day, the normalized amount of missing data per run day was calculated as the number of  
661 missing values for the respective metabolite on the respective run day divided by the total  
662 number of observations for that run day, divided by the median amount of missing data of  
663 that metabolite over all run days. Thus, a normalized run day-missingness of 1 is the average  
664 run day-missingness for a given metabolite. Pearson correlation coefficients were calculated  
665 across all pairs of platforms. (B) Standard deviation of missing values across run days,  
666 depending on the total amount of missing data for each platform. Each dot in the plot shows  
667 the total proportion of missing values and the run day variation for one metabolite. (C)–(D)  
668 The distribution of the total amount of missing values is shown for a metabolite with  
669 moderate (ursodeoxycholate) and high (gamma-glutamylisoleucine) standard deviation.

670 **Figure 4. Run day-dependent LOD.** (A) Histogram of Pearson correlation coefficients of the  
671 percent of missing values and run day means. (B) Scatterplot of run day mean versus percent  
672 missing values, with 7-methylxanthine as an example of a negative correlation. (C) Run day  
673 distributions of 7-methylxanthine before run day normalization.

674 **Figure 5. Mechanisms of missing data and imputation approaches used in the simulation**  
675 **study.** (A)–(E) Mechanisms of missing values used in the simulation study, based on evidence  
676 from real metabolomics data. (F) Venn diagram of imputation methods showing different  
677 characteristics. Note that the figure contains complete case analysis (CCA), which is not an  
678 imputation method, and is noted in brackets. CCA and *mean* were placed outside the Venn  
679 diagram, as they do not comprise any of the four characteristics. LOD: limit of detection.

680 **Figure 6. Simulation results for Pearson, partial correlation, and logistic regression analysis.**  
681 Performance of imputation approaches in data scenarios where (A) both variables followed a  
682 run day-specific probabilistic LOD mechanism, (B) both variables showed non-systematic  
683 patterns of missing data, and (C) one variable with run day-specific probabilistic LOD-based  
684 missing data and the other variable showed non-systematic patterns of missing data. Type 1  
685 error and power reflect the false positive and true positive rate of hypothesis testing,  
686 respectively. Note that power = 1 - type 2 error rate. Note further that due to readability  
687 issues, only KNN-based imputation methods with  $K = 3, 10,$  and  $20$  were included, whereas  
688 KNN imputation with  $K = 1$  and  $5$  can be found in File S5.

689 **Figure 7. Evaluation of imputation approaches on real data.** (A) Pathway-based modularity  
690 for each imputation strategy. Modularity  $Q$  was calculated based on pathways. Vertical lines  
691 represent bootstrap-based confidence intervals (1000 times resampling). (B) The ability to  
692 gain statistical power and to preserve real metabolite-SNP associations after imputation.  
693 Circle color represents the ability of imputation methods to preserve effect sizes, with red  
694 and blue indicating possible overestimation and underestimation, respectively, and yellow  
695 corresponding to cases with good preservation of the association. Circle size depicts the gain  
696 in statistical power after imputation. The bigger the circle the higher the statistical power  
697 gain after imputation compared to CCA. Squares correspond to cases where no statistical  
698 power was gained. Note that due to readability issues, only KNN-based imputation methods  
699 with  $K = 3, 10,$  and  $20$  were included, whereas KNN imputation with  $K = 1$  and  $5$  can be found  
700 in File S6 and Table S8.

701

## 702 **Funding statement**

703 This work was supported by grants from the German Federal Ministry of Education and Research  
704 (BMBF), by BMBF Grant no. 01ZX1313C (project e:Athero-MED) and Grant no. 03IS2061B (project  
705 Gani\_Med). Moreover, the research leading to these results has received funding from the European  
706 Union's Seventh Framework Programme [FP7-Health-F5-2012] under grant agreement n° 305280  
707 (MIMOmics) and from the European Research Council (starting grant "LatentCauses"). KS is  
708 supported by Biomedical Research Program funds at Weill Cornell Medical College in Qatar, a  
709 program funded by the Qatar Foundation. The KORA Augsburg studies were financed by the  
710 Helmholtz Zentrum München, German Research Center for Environmental Health, Neuherberg,  
711 Germany and supported by grants from the German Federal Ministry of Education and Research  
712 (BMBF). Analyses in the EPIC-Norfolk study were supported by funding from the Medical Research  
713 Council (MC\_PC\_13048 and MC\_UU\_12015/1).

714

715 The funders had no role in study design, data collection and analysis, decision to publish, or  
716 preparation of the manuscript.

717

## 718 References

- 719 1. Fearnley LG, Inouye M. Metabolomics in epidemiology: from metabolite concentrations to  
720 integrative reaction networks. *Int J Epidemiol*. 2016 Apr 26;dyw046.
- 721 2. Patti GJ, Yanes O, Siuzdak G. Innovation: Metabolomics: the apogee of the omics trilogy. *Nat*  
722 *Rev Mol Cell Biol*. 2012 Apr;13(4):263–9.
- 723 3. Blow N. Metabolomics: Biochemistry's new look. *Nature*. 2008 Oktober;455(7213):697–700.
- 724 4. Mook-Kanamori DO, Selim MME-D, Takiddin AH, Al-Homsi H, Al-Mahmoud KAS, Al-Obaidli A, et  
725 al. 1,5-Anhydroglucitol in Saliva Is a Noninvasive Marker of Short-Term Glycemic Control. *J Clin*  
726 *Endocrinol Metab*. 2014 Jan 1;99(3):E479–83.
- 727 5. Do KT, Kastenmüller G, Mook-Kanamori DO, Yousri NA, Theis FJ, Suhre K, et al. Network-based  
728 approach for analyzing intra- and interfluid metabolite associations in human blood, urine, and  
729 saliva. *J Proteome Res*. 2015 Feb 6;14(2):1183–94.
- 730 6. Urpi-Sarda M, Almanza-Aguilera E, Tulipani S, Tinahones FJ, Salas-Salvadó J, Andres-Lacueva C.  
731 Metabolomics for Biomarkers of Type 2 Diabetes Mellitus: Advances and Nutritional  
732 Intervention Trends. *Curr Cardiovasc Risk Rep*. 2015 Feb 17;9(3):1–12.
- 733 7. Rasmiena AA, Ng TW, Meikle PJ. Metabolomics and ischaemic heart disease. *Clin Sci*. 2013 Mar  
734 1;124(5):289–306.
- 735 8. Rhee EP, Gerszten RE. Metabolomics and Cardiovascular Biomarker Discovery. *Clin Chem*. 2012  
736 Jan 1;58(1):139–47.
- 737 9. Wang JH, Byun J, Pennathur S. Analytical Approaches to Metabolomics and Applications to  
738 Systems Biology. *Semin Nephrol*. 2010 Sep 1;30(5):500–11.
- 739 10. Armitage EG, Godzien J, Alonso-Herranz V, López-González Á, Barbas C. Missing value  
740 imputation strategies for metabolomics data. *Electrophoresis*. 2015 Dec;36(24):3050–60.
- 741 11. Hrydziuszko O, Viant MR. Missing values in mass spectrometry based metabolomics: an  
742 undervalued step in the data processing pipeline. *Metabolomics*. 2011 Oct 8;8(1):161–74.
- 743 12. Gromski PS, Xu Y, Kotze HL, Correa E, Ellis DI, Armitage EG, et al. Influence of Missing Values  
744 Substitutes on Multivariate Analysis of Metabolomics Data. *Metabolites*. 2014 Jun 16;4(2):433–  
745 52.
- 746 13. Xia J, Psychogios N, Young N, Wishart DS. MetaboAnalyst: a web server for metabolomic data  
747 analysis and interpretation. *Nucleic Acids Res*. 2009 Jul 1;37(Web Server issue):W652–60.
- 748 14. Redestig H, Kobayashi M, Saito K, Kusano M. Exploring Matrix Effects and Quantification  
749 Performance in Metabolomics Experiments Using Artificial Biological Gradients. *Anal Chem*.  
750 2011 Jul 15;83(14):5645–51.
- 751 15. Di Guida R, Engel J, Allwood JW, Weber RJM, Jones MR, Sommer U, et al. Non-targeted UHPLC-  
752 MS metabolomic data processing methods: a comparative investigation of normalisation,  
753 missing value imputation, transformation and scaling. *Metabolomics [Internet]*. 2016 [cited  
754 2017 Jan 13];12. Available from: <http://www.ncbi.nlm.nih.gov/pmc/articles/PMC4831991/>



- 755 16. Chen H, Quandt SA, Grzywacz JG, Arcury TA. A Distribution-Based Multiple Imputation Method  
756 for Handling Bivariate Pesticide Data with Values below the Limit of Detection. *Environ Health*  
757 *Perspect.* 2011 Mar;119(3):351–6.
- 758 17. Richardson DB, Ciampi A. Effects of exposure measurement error when an exposure variable is  
759 constrained by a lower limit. *Am J Epidemiol.* 2003 Feb 15;157(4):355–63.
- 760 18. van Buuren S. Multiple imputation of discrete and continuous data by fully conditional  
761 specification. *Stat Methods Med Res.* 2007 Jun;16(3):219–42.
- 762 19. Troyanskaya O, Cantor M, Sherlock G, Brown P, Hastie T, Tibshirani R, et al. Missing value  
763 estimation methods for DNA microarrays. *Bioinforma Oxf Engl.* 2001 Jun;17(6):520–5.
- 764 20. Tutz G, Ramzan S. Improved methods for the imputation of missing data by nearest neighbor  
765 methods. *Comput Stat Data Anal.* 2015 Oktober;90:84–99.
- 766 21. Taylor SL, Ruhaak LR, Kelly K, Weiss RH, Kim K. Effects of imputation on correlation: implications  
767 for analysis of mass spectrometry data from multiple biological matrices. *Brief Bioinform.* 2016  
768 Feb 19;
- 769 22. Krumsiek J, Suhre K, Illig T, Adamski J, Theis FJ. Gaussian graphical modeling reconstructs  
770 pathway reactions from high-throughput metabolomics data. *BMC Syst Biol.* 2011;5:21.
- 771 23. Mitra K, Carvunis A-R, Ramesh SK, Ideker T. Integrative approaches for finding modular  
772 structure in biological networks. *Nat Rev Genet.* 2013 Oct;14(10):719–32.
- 773 24. Newman MEJ, Girvan M. Finding and evaluating community structure in networks. *Phys Rev E*  
774 *Stat Nonlin Soft Matter Phys.* 2004 Feb;69(2 Pt 2):026113.
- 775 25. Shin S-Y, Fauman EB, Petersen A-K, Krumsiek J, Santos R, Huang J, et al. An atlas of genetic  
776 influences on human blood metabolites. *Nat Genet.* 2014 Jun;46(6):543–50.
- 777 26. Shrawder E, Martinez-Carrion M. Evidence of phenylalanine transaminase activity in the  
778 isoenzymes of aspartate transaminase. *J Biol Chem.* 1972 Apr 25;247(8):2486–92.
- 779 27. Helsel DR. More than obvious: better methods for interpreting nondetect data. *Environ Sci*  
780 *Technol.* 2005 Oct 15;39(20):419A–423A.
- 781 28. Shah JS, Rai SN, DeFilippis AP, Hill BG, Bhatnagar A, Brock GN. Distribution based nearest  
782 neighbor imputation for truncated high dimensional data with applications to pre-clinical and  
783 clinical metabolomics studies. *BMC Bioinformatics [Internet].* 2017 Feb 20 [cited 2017 Mar  
784 16];18. Available from: <http://www.ncbi.nlm.nih.gov/pmc/articles/PMC5319174/>
- 785 29. Helsel DR. Less than obvious - statistical treatment of data below the detection limit. *Environ*  
786 *Sci Technol.* 1990 Dezember;24(12):1766–74.
- 787 30. Holle R, Happich M, Löwel H, Wichmann HE, MONICA/KORA Study Group. KORA--a research  
788 platform for population based health research. *Gesundheitswesen Bundesverb Ärzte Öffentl*  
789 *Gesundheitsdienstes Ger.* 2005 Aug;67 Suppl 1:S19-25.
- 790 31. Rubin DB. Introduction. In: *Multiple Imputation for Nonresponse in Surveys [Internet].* John  
791 Wiley & Sons, Inc.; 1987 [cited 2016 Feb 1]. p. 1–26. Available from:  
792 <http://onlinelibrary.wiley.com/doi/10.1002/9780470316696.ch1/summary>



- 793 32. Marshall A, Altman DG, Holder RL, Royston P. Combining estimates of interest in prognostic  
794 modelling studies after multiple imputation: current practice and guidelines. *BMC Med Res*  
795 *Methodol.* 2009 Jul 28;9:57.
- 796 33. D'Angelo GM, Luo J, Xiong C. Missing Data Methods for Partial Correlations. *J Biom Biostat*  
797 [Internet]. 2012 Dec [cited 2016 Feb 28];3(8). Available from:  
798 <http://www.ncbi.nlm.nih.gov/pmc/articles/PMC3772686/>
- 799 34. van Buuren S, Boshuizen HC, Knook DL. Multiple imputation of missing blood pressure  
800 covariates in survival analysis. *Stat Med.* 1999 Mar 30;18(6):681–94.
- 801 35. Van Hoewyk J, Lepkowski JM, Solenberger P, Raghunathan TE. A multivariate technique for  
802 multiply imputing missing values using a sequence of regression models. *Surv Methodol.* 2001  
803 Aug 22;27(1):85–95.
- 804 36. van Buuren S, Groothuis-Oudshoorn K. mice: Multivariate Imputation by Chained Equations in R  
805 | van Buuren | *Journal of Statistical Software.* *J Stat Softw* [Internet]. 2011 Dec 12 [cited 2016  
806 Feb 28];45(3). Available from: <https://www.jstatsoft.org/article/view/v045i03>
- 807 37. Aichler M, Borgmann D, Krumsiek J, Buck A, MacDonald PE, Fox JEM, et al. N-acyl Taurines and  
808 Acylcarnitines Cause an Imbalance in Insulin Synthesis and Secretion Provoking  $\beta$  Cell  
809 Dysfunction in Type 2 Diabetes. *Cell Metab.* 2017 Jun 6;25(6):1334–1347.e4.

810

811

812 **Supporting information captions**

813 File S1. LOD tendency.

814 File S2. Runday-dependent densities in relation with missingness.

815 File S3. Simulation framework.

816 File S4. Imputation methods.

817 File S5. Simulation evaluation results.

818 File S6. Metabolite-SNP associations–beeswarm plots.

819 File S7. Metabolite-SNP associations compared with EPIC-Norfolk.

820 Table S8. Metabolite-SNP associations–linear regression results.

821 Table S9. KORA F4 annotations.

822 File S10. KORA F4 experimental setup.

823 File S11. KNN-obs-sel and MICE imputation code.

824

825

826

827

828

829

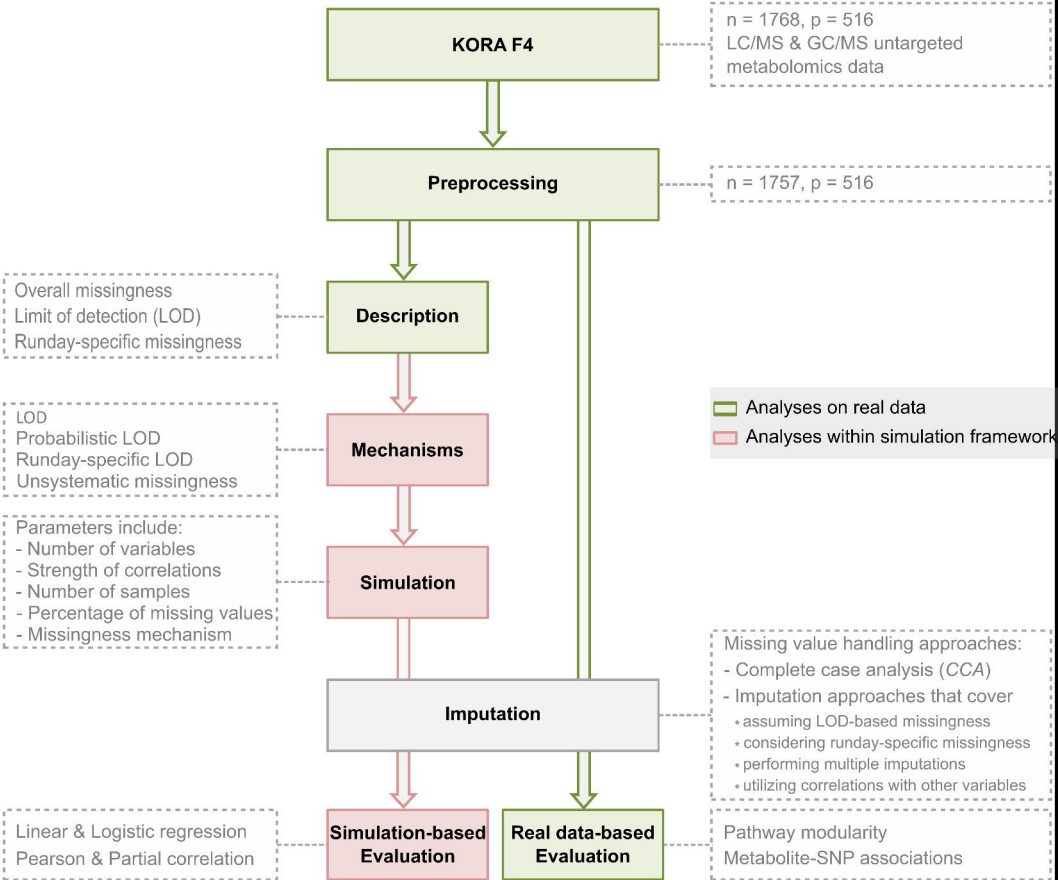

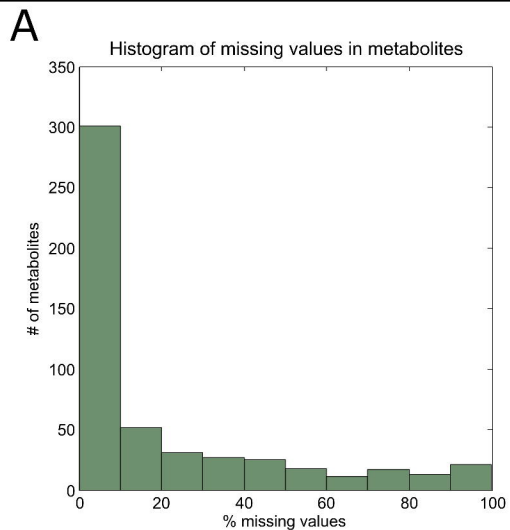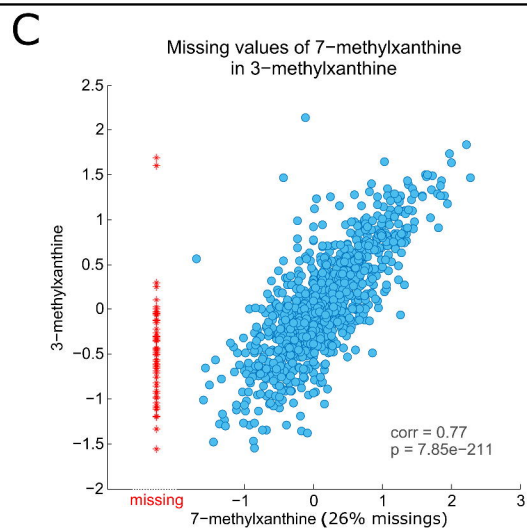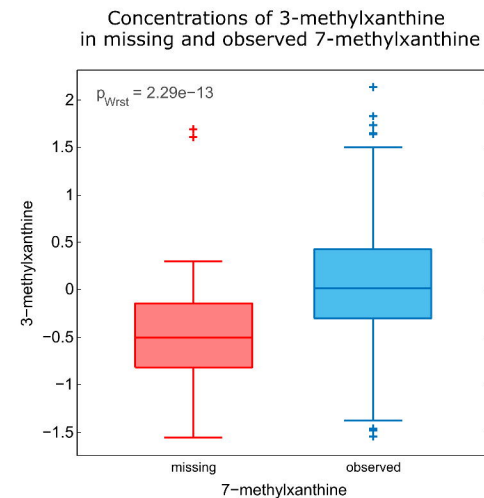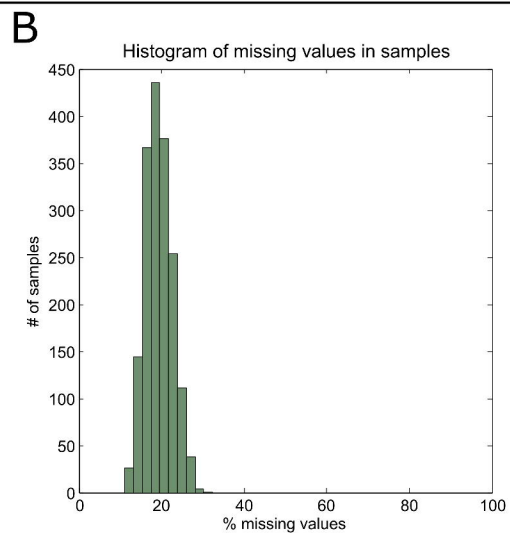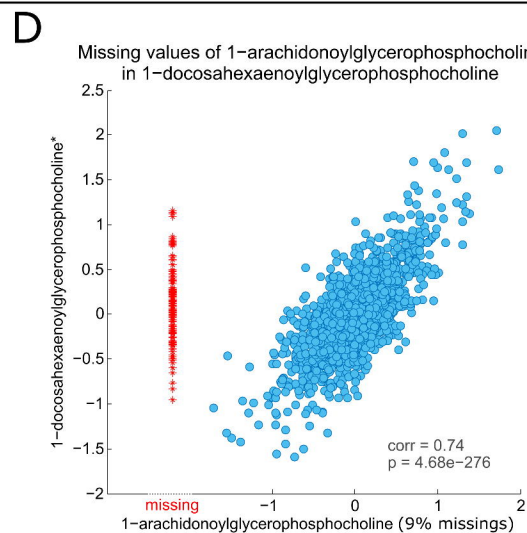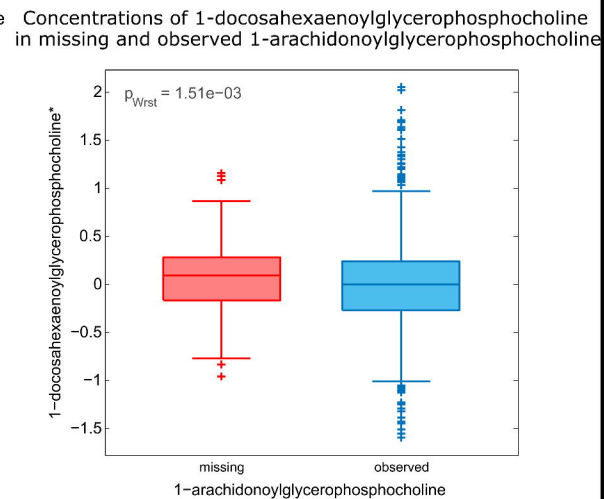

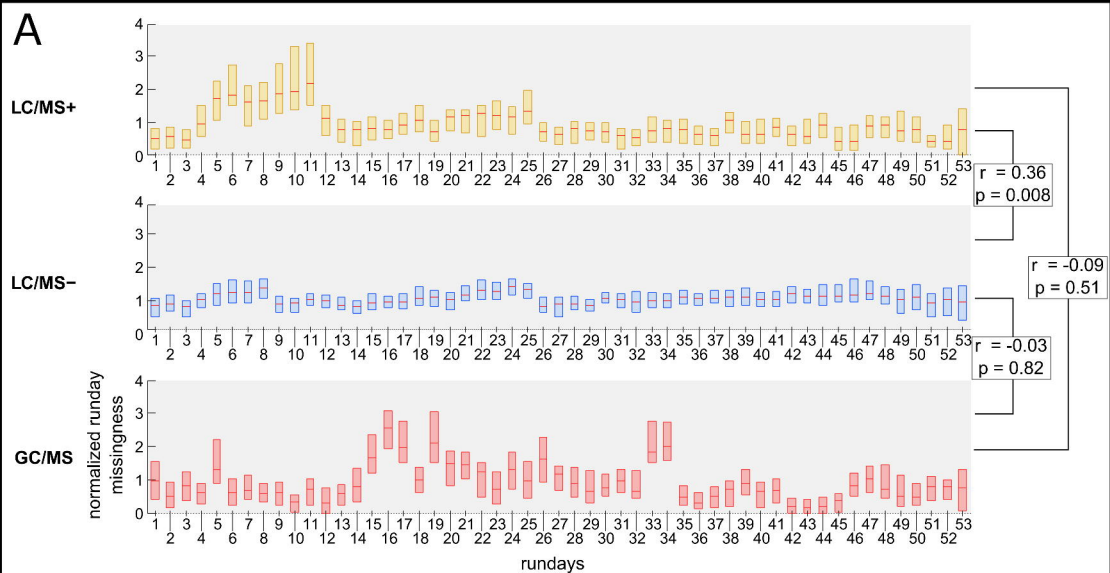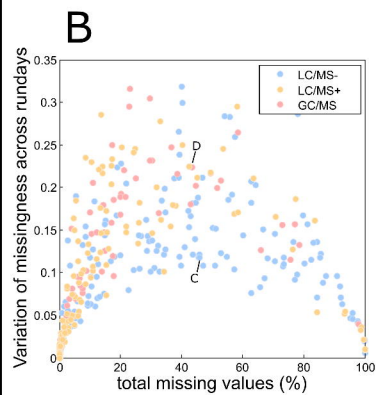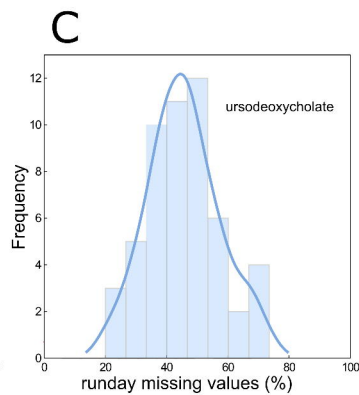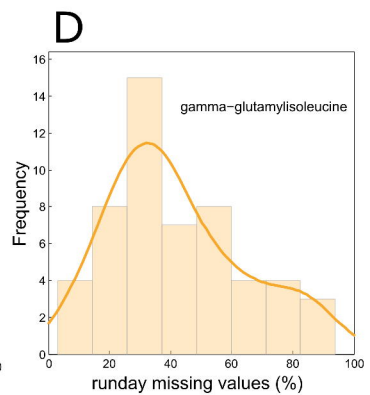

**A**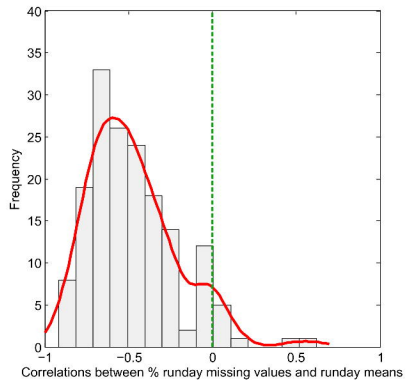**B**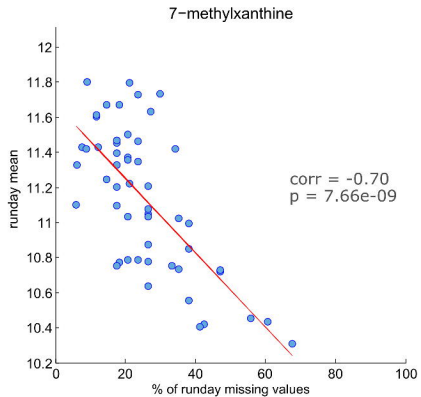**C**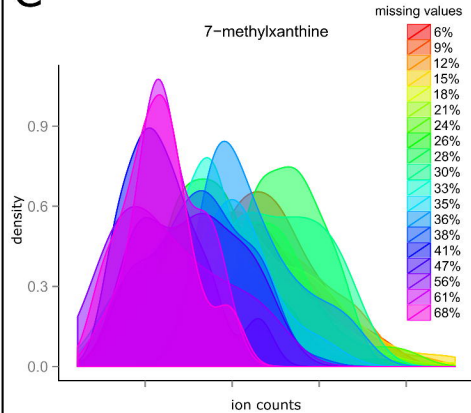

Fixed LOD

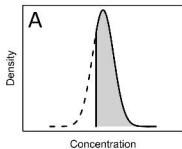

Probabilistic LOD

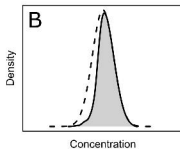

Runday-specific fixed LOD

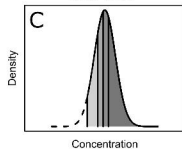

Runday-specific probabilistic LOD

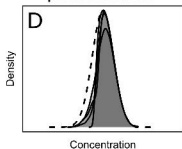

Unsystematic missingness

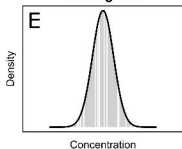

**F** **Property (i)** Assume LOD-based missingness explicitly

**Property (iv)** Multiple imputation

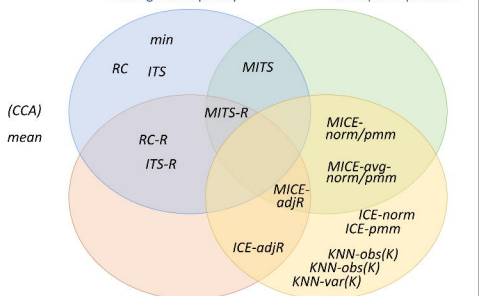

**Property (ii)** Consider runday-specific missingness explicitly

**Property (iii)** Utilize correlations with other variables

|               |                                                                      |
|---------------|----------------------------------------------------------------------|
| CCA           | Complete case analysis                                               |
| min           | Minimum imputation                                                   |
| RC            | Richardson & Ciampi                                                  |
| ITS           | Imputation by truncated sampling                                     |
| MITS          | Multiple ITS                                                         |
| RC-R          | RC within rundays                                                    |
| ITS-R         | ITS within rundays                                                   |
| MITS-R        | MITS within rundays                                                  |
| mean          | Mean imputation                                                      |
| ICE-norm      | Imputation by chained equations using Bayesian regression imputation |
| ICE-pmm       | ICE using predictive mean matching                                   |
| ICE-adjR      | ICE with random runday intercept                                     |
| MICE-norm     | Multiple ICE-norm, pooling statistics                                |
| MICE-pmm      | Multiple ICE-pmm, pooling statistics                                 |
| MICE-avg-norm | Multiple ICE-norm, pooling data                                      |
| MICE-avg-pmm  | Multiple ICE-pmm, pooling data                                       |
| MICE-adjR     | Multiple ICE-adjR                                                    |
| KNN-var(K)    | K-nearest neighbor imputation per variable                           |
| KNN-obs(K)    | KNN per observation                                                  |
| KNN-obs-se(K) | KNN per observation using selected variables                         |

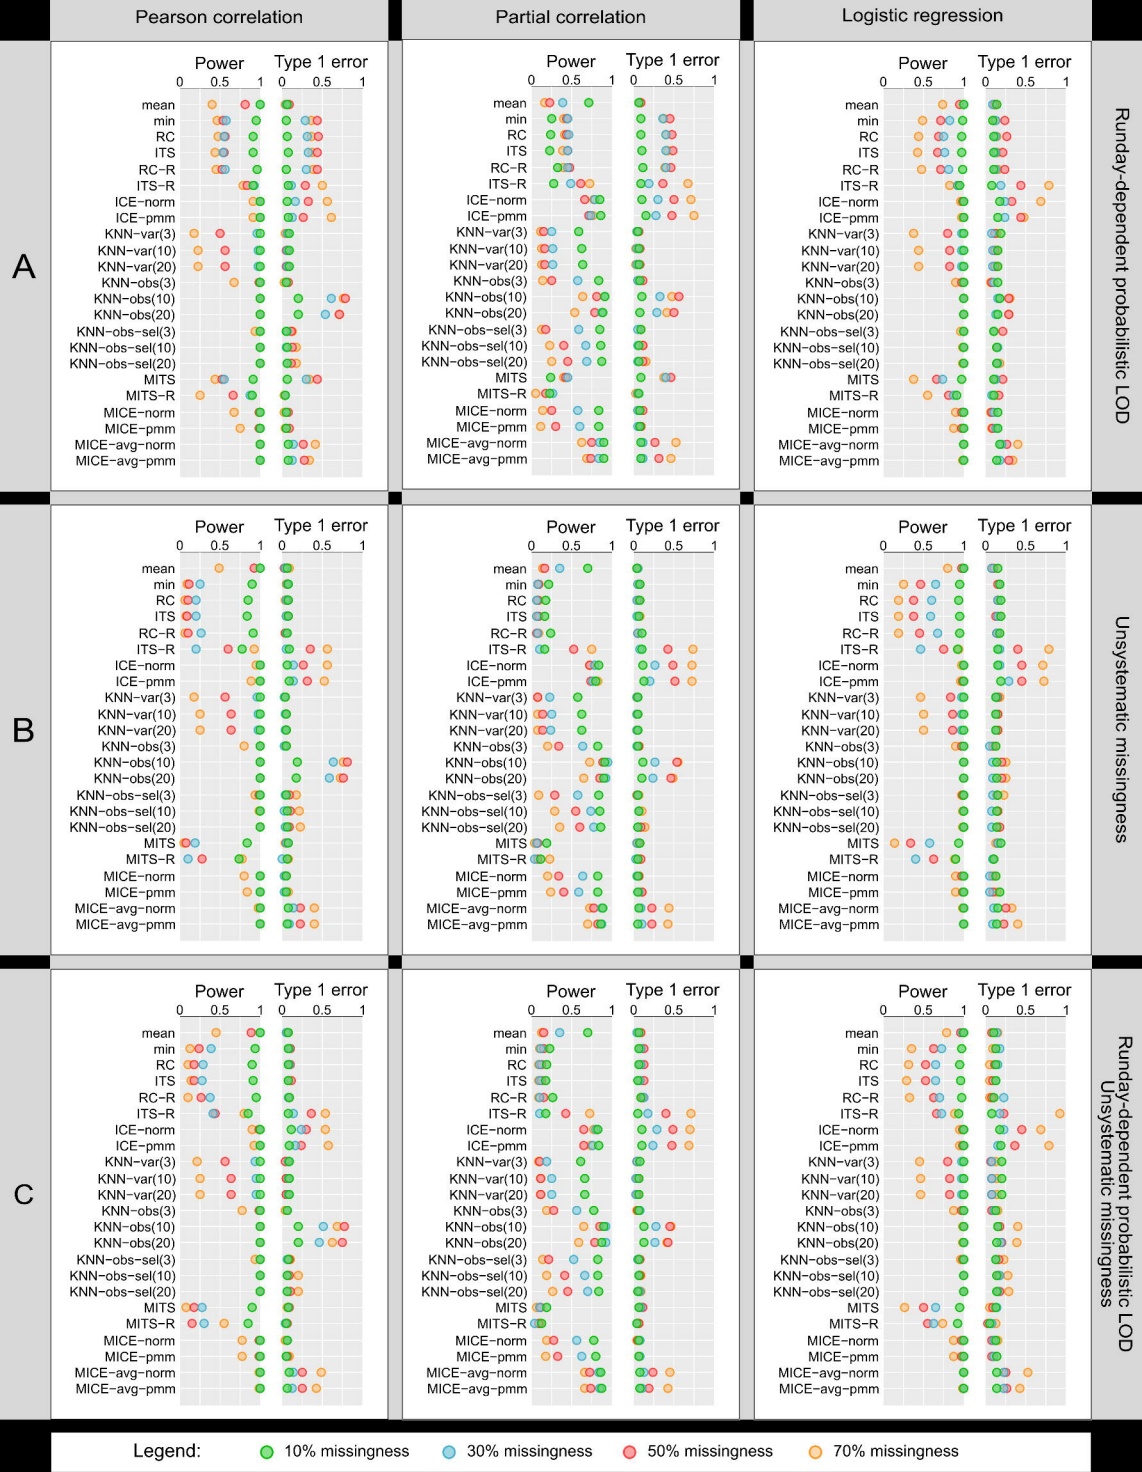



**A**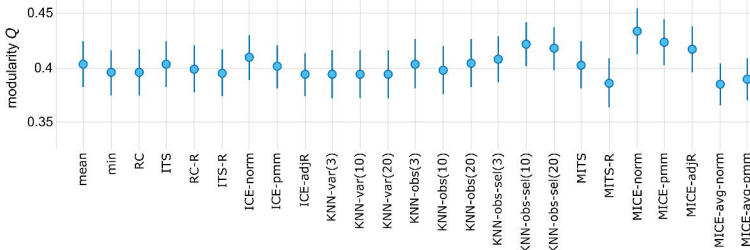**B**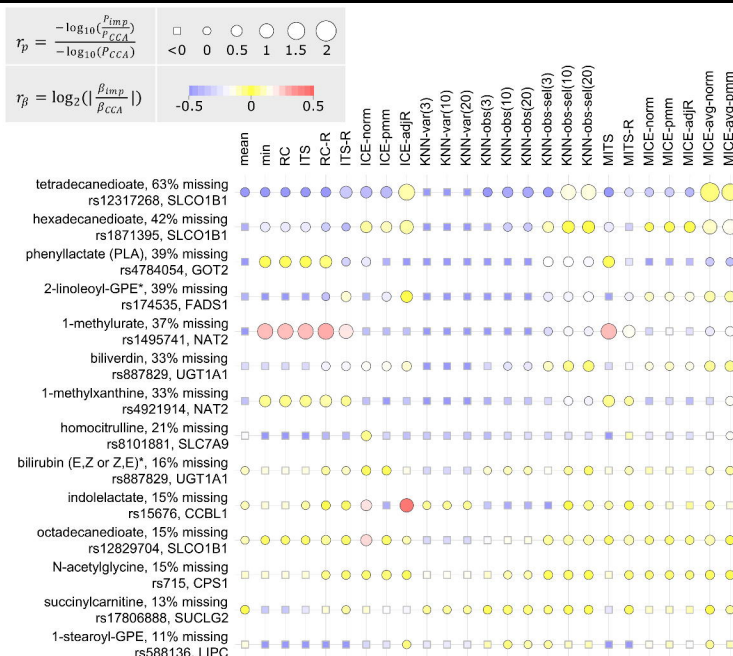

Source: https://www.biorxiv.org/content/10.1101/260281v4.full.pdf
